# Supplementary material
Source: PubMed Central journal article supplement (PMC10119775)
Supplement: jamaoncol-e230356-s002.pdf [file jamaoncol-e230356-s002.pdf]

## Supplemental Online Content

Ryu S, Deshmukh S, Timmerman RD, et al. Stereotactic radiosurgery vs conventional radiotherapy for localized vertebral metastases of the spine: phase 3 results of NRG Oncology/RTOG 0631 randomized clinical trial. *JAMA Oncol*. Published online April 20, 2023. doi:10.1001/jamaoncol.2023.0356

**eTable 1.** Zubrod Performance Status for Patients who Completed NRPS vs Those Who Did Not

**eTable 2.** Numerical Rating Pain Scale (NRPS) Patient Compliance

**eTable 3.** Sensitivity Analyses of Pain Response at 3 Months

**eTable 4.** Change Of NRPS Pain Score And Pain Response Of The Index Spine Only

**eTable 5.** Repeated Measures Proportional Odds Mixed Effects Model for Ordinal NRPS Score

**eTable 6.** A) Rapidity of Pain Response. B) Duration of Pain Response

**eTable 7.** Repeated Measures Mixed Effects Model for FACT-G Total Score

**eTable 8.** Number of Patient with an Adverse Event by Category, Term, and Grade Definitely, Probably, or Possibly Related to Protocol Treatment

**eTable 9.** Time to Compression Fracture

This supplemental material has been provided by the authors to give readers additional information about their work.

**Supplemental Table 1. Zubrod Performance Status for Patients who Completed NRPS vs. Those Who Did Not**

|                      | Did Not Complete NRPS | Completed NRPS | Chi-Square p-value |
|----------------------|-----------------------|----------------|--------------------|
| Baseline & 1 month   | (n=93)                | (n=246)        | 0.047              |
| 0                    | 16 ( 17.2%)           | 69 ( 28.0%)    |                    |
| 1                    | 55 ( 59.1%)           | 140 ( 56.9%)   |                    |
| 2                    | 22 ( 23.7%)           | 37 ( 15.0%)    |                    |
| Baseline & 3 months  | (n=125)               | (n=214)        | 0.001              |
| 0                    | 19 ( 15.2%)           | 66 ( 30.8%)    |                    |
| 1                    | 76 ( 60.8%)           | 119 ( 55.6%)   |                    |
| 2                    | 30 ( 24.0%)           | 29 ( 13.6%)    |                    |
| Baseline & 6 months  | (n=232)               | (n=107)        | 0.005              |
| 0                    | 49 ( 21.1%)           | 36 ( 33.6%)    |                    |
| 1                    | 134 ( 57.8%)          | 61 ( 57.0%)    |                    |
| 2                    | 49 ( 21.1%)           | 10 ( 9.3%)     |                    |
| Baseline & 12 months | (n=242)               | (n=97)         | <0.001             |
| 0                    | 45 ( 18.6%)           | 40 ( 41.2%)    |                    |
| 1                    | 150 ( 62.0%)          | 45 ( 46.4%)    |                    |
| 2                    | 47 ( 19.4%)           | 12 ( 12.4%)    |                    |
| Baseline & 24 months |                       |                | 0.007              |
| 0                    | 65 ( 22.3%)           | 20 ( 42.6%)    |                    |
| 1                    | 172 ( 58.9%)          | 23 ( 48.9%)    |                    |
| 2                    | 55 ( 18.8%)           | 4 ( 8.5%)      |                    |

Other baseline characteristics compared with significant differences noted: age, baseline NRPS score (p=0.03 at 3 months, p=0.04 at 12 months), gender, race, ethnicity, number of spine metastases, location of largest spine metastasis, use of pain medication (p=0.005 at 12 months), type of tumor (p=0.04 at 3 months), and intended SBRT single fraction dose.

**Supplemental Table 2. NRPS Patient Compliance**

|                                  | SRS<br>(n=217) | cEBRT<br>(n=136) |
|----------------------------------|----------------|------------------|
| <b>Baseline</b>                  |                |                  |
| Clinically ineligible            | 8 ( 3.7%)      | 6 ( 4.4%)        |
| Complete                         | 209 ( 96.3%)   | 130 ( 95.6%)     |
| <b>Month 1</b>                   |                |                  |
| Clinically ineligible            | 8 ( 3.7%)      | 6 ( 4.4%)        |
| Complete                         | 153 ( 70.5%)   | 93 ( 68.4%)      |
| Consent withdrawal               | 3 ( 1.4%)      | 9 ( 6.6%)        |
| Refused due to illness           | 8 ( 3.7%)      | 4 ( 2.9%)        |
| Unable to contact                | 6 ( 2.8%)      | 7 ( 5.1%)        |
| Institutional error              | 6 ( 2.8%)      | 2 ( 1.5%)        |
| Patient refused for other reason | 11 ( 5.1%)     | 7 ( 5.1%)        |
| Unknown                          | 3 ( 1.4%)      | 2 ( 1.5%)        |
| Out of time point                | 19 ( 8.8%)     | 6 ( 4.4%)        |
| <b>Month 3</b>                   |                |                  |
| Clinically ineligible            | 8 ( 3.7%)      | 6 ( 4.4%)        |
| Complete                         | 138 ( 63.6%)   | 76 ( 55.9%)      |
| Deceased                         | 17 ( 7.8%)     | 12 ( 8.8%)       |
| Consent withdrawal               | 6 ( 2.8%)      | 13 ( 9.6%)       |
| Refused due to illness           | 6 ( 2.8%)      | 3 ( 2.2%)        |
| Unable to contact                | 11 ( 5.1%)     | 3 ( 2.2%)        |
| Institutional error              | 4 ( 1.8%)      | 4 ( 2.9%)        |
| Patient refused for other reason | 21 ( 9.7%)     | 14 ( 10.3%)      |
| Unknown                          | 4 ( 1.8%)      | 1 ( 0.7%)        |
| Out of time point                | 2 ( 0.9%)      | 4 ( 2.9%)        |
| <b>Month 6</b>                   |                |                  |
| Clinically ineligible            | 8 ( 3.7%)      | 6 ( 4.4%)        |
| Complete                         | 68 ( 31.3%)    | 39 ( 28.7%)      |
| Deceased                         | 53 ( 24.4%)    | 28 ( 20.6%)      |
| Consent withdrawal               | 8 ( 3.7%)      | 15 ( 11.0%)      |
| Refused due to illness           | 4 ( 1.8%)      | 1 ( 0.7%)        |
| Unable to contact                | 9 ( 4.1%)      | 7 ( 5.1%)        |
| Institutional error              | 7 ( 3.2%)      | 6 ( 4.4%)        |
| Patient refused for other reason | 27 ( 12.4%)    | 14 ( 10.3%)      |
| Unknown                          | 5 ( 2.3%)      | 5 ( 3.7%)        |
| Not Received                     | 0 ( 0.0%)      | 1 ( 0.7%)        |
| Out of time point                | 28 ( 12.9%)    | 14 ( 10.3%)      |
| <b>Month 12</b>                  |                |                  |
| Clinically ineligible            | 8 ( 3.7%)      | 6 ( 4.4%)        |
| Complete                         | 59 ( 27.2%)    | 38 ( 27.9%)      |
| Deceased                         | 88 ( 40.6%)    | 43 ( 31.6%)      |
| Consent withdrawal               | 10 ( 4.6%)     | 15 ( 11.0%)      |
| Refused due to illness           | 3 ( 1.4%)      | 2 ( 1.5%)        |

**Supplemental Table 2. NRPS Patient Compliance**

|                                  | SRS<br>(n=217) | cEBRT<br>(n=136) |
|----------------------------------|----------------|------------------|
| Unable to contact                | 15 ( 6.9%)     | 6 ( 4.4%)        |
| Institutional error              | 8 ( 3.7%)      | 3 ( 2.2%)        |
| Patient refused for other reason | 18 ( 8.3%)     | 14 ( 10.3%)      |
| Unknown                          | 3 ( 1.4%)      | 2 ( 1.5%)        |
| Not Received                     | 0 ( 0.0%)      | 2 ( 1.5%)        |
| Out of time point                | 5 ( 2.3%)      | 5 ( 3.7%)        |
| <b>Month 24</b>                  |                |                  |
| Clinically ineligible            | 8 ( 3.7%)      | 6 ( 4.4%)        |
| Complete                         | 31 ( 14.3%)    | 16 ( 11.8%)      |
| Deceased                         | 118 ( 54.4%)   | 59 ( 43.4%)      |
| Consent withdrawal               | 11 ( 5.1%)     | 15 ( 11.0%)      |
| Refused due to illness           | 2 ( 0.9%)      | 3 ( 2.2%)        |
| Unable to contact                | 5 ( 2.3%)      | 5 ( 3.7%)        |
| Institutional error              | 10 ( 4.6%)     | 6 ( 4.4%)        |
| Patient refused for other reason | 18 ( 8.3%)     | 15 ( 11.0%)      |
| Unknown                          | 2 ( 0.9%)      | 3 ( 2.2%)        |
| Not Received                     | 6 ( 2.8%)      | 6 ( 4.4%)        |
| Out of time point                | 6 ( 2.8%)      | 2 ( 1.5%)        |

\*If the pain score from the date of treatment was missing, the study entry pain score was used resulting in 100% compliance for eligible patients.

Time windows : Month 1= + 1 month /- 14 days; Month 3= +2 /- 1 month; Month 6= +/- 1 month; Month 12= +/- 2 month; Month 24= +/- 2 month

**Supplemental Table 3. Sensitivity Analyses of Pain Response at 3 Months**

|                                | SBRT         | EBRT        | p-value <sup>††</sup> |
|--------------------------------|--------------|-------------|-----------------------|
| 3 month Responder <sup>1</sup> | (n=138)      | (n=76)      |                       |
| No                             | 52 ( 37.7%)  | 18 ( 23.7%) | 0.99                  |
| Yes                            | 86 ( 62.3%)  | 58 ( 76.3%) |                       |
| 3 month Responder <sup>2</sup> | (n=192)      | (n=118)     |                       |
| No                             | 81 ( 42.2%)  | 30 ( 25.4%) | 0.99                  |
| Yes                            | 111 ( 57.8%) | 88 ( 74.6%) |                       |
| 3 month Responder <sup>3</sup> | (n=138)      | (n=76)      |                       |
| No                             | 39 ( 28.3%)  | 14 ( 18.4%) | 0.96                  |
| Yes                            | 99 ( 71.7%)  | 62 ( 81.6%) |                       |
| 3 month Responder <sup>4</sup> | (n=192)      | (n=118)     |                       |
| No                             | 135 ( 70.3%) | 72 ( 61.0%) | 0.96                  |
| Yes                            | 57 ( 29.7%)  | 46 ( 39.0%) |                       |

<sup>††</sup>one-sided p-value from Fishers exact test

<sup>1</sup>Complete or partial response at 3 month only using index site NRPS (not secondary site(s) and medication increase).

<sup>2</sup>Complete or partial response with no increase in pain meds and no progressive response for the secondary sites at 3 month (assuming all alive patients with consent that are missing NRPS scores are responders).

<sup>3</sup>Complete or partial response using 2 points instead of 3 points at 3 month (Excluded secondary sites response and pain meds criteria).

<sup>4</sup>Complete or partial response with no increase in pain meds and no progressive response for the secondary sites at 3 month (assuming all alive patients with consent that are missing NRPS scores are non-responders).

**Supplemental Table 4. Change of NRPS pain score and pain response of the index spine only after treatment**

| Time from treatment | Mean Change from Baseline Pain score ± Standard Deviation |     |            |    | Cumulative Pain Response |        |
|---------------------|-----------------------------------------------------------|-----|------------|----|--------------------------|--------|
|                     | SRS                                                       | n   | cEBRT      | n  | SRS                      | cEBRT  |
| 1 week*             | -1.21±3.44                                                | 66  | -1.48±2.94 | 27 | 37.9%                    | 37.0 % |
| 2 weeks*            | -2.59±3.23                                                | 56  | -2.36±2.90 | 22 | 51.8%                    | 54.6%  |
| 3 weeks*            | -2.72±3.35                                                | 47  | -2.58±2.89 | 24 | 57.5%                    | 62.5%  |
| 1 month             | -3.03±3.33                                                | 153 | -2.45±3.28 | 93 | 64.7%                    | 55.9%  |
| 3 months            | -2.98±3.34                                                | 138 | -3.83±2.97 | 76 | 62.3%                    | 76.4%  |
| 6 months            | -3.07±3.50                                                | 68  | -3.85±2.56 | 39 | 72.1%                    | 82.0%  |
| 12 months           | -3.34±3.25                                                | 59  | -3.18±3.23 | 38 | 71.2%                    | 63.2%  |

\*Due to unreliable data for patients who had multiple sites treated, only patients who had a single site treated and reported a single pain score were included.

Secondary sites and pain medication were excluded from the pain response definition. SRS=stereotactic radiosurgery; cEBRT=conventional external beam radiotherapy.

**Supplemental Table 5. Repeated Measures Proportional Odds Mixed Effects Model for Ordinal NRPS Score**

| <b>Effect</b>                   |                   |                                |                            |
|---------------------------------|-------------------|--------------------------------|----------------------------|
| <b>A. Complete Case Data</b>    |                   |                                |                            |
| EBRT vs. SBRT                   | <b>Odds Ratio</b> | <b>95% Confidence Interval</b> | <b>p-value<sup>1</sup></b> |
| Time                            | 1.08              | 0.63, 1.87                     | 0.78                       |
| 3 Months vs 1 Month             | 1.68              | 1.13, 2.49                     | <0.001                     |
| 6 Months vs 1 Month             | 2.66              | 1.56, 4.52                     |                            |
| 12 Months vs 1 Month            | 1.30              | 0.78, 2.16                     |                            |
| Time*Treatment arm              | -                 | -                              | 0.01                       |
| Baseline NRPS Index Score       | 0.75              | 0.67, 0.84                     | <0.001                     |
| Radioresistant Tumor (vs other) | 1.11              | 0.60, 2.08                     | 0.73                       |
| Zubrod 1-2 vs. 0                | 0.62              | 0.37, 1.06                     | 0.08                       |
| <b>A. Imputed Data</b>          |                   |                                |                            |
| EBRT vs. SBRT                   | <b>Estimate</b>   | <b>95% Confidence Interval</b> | <b>p-value<sup>2</sup></b> |
| Time                            | 0.50              | -0.20, 1.21                    | 0.16                       |
| 3 Months vs 1 Month             | -0.01             | -0.70, 0.67                    | 0.97                       |
| 6 Months vs 1 Month             | -0.41             | -1.96, 1.15                    | 0.60                       |
| 12 Months vs 1 Month            | -1.33             | -1.96, -0.71                   | <0.001                     |
| Time*Treatment arm              |                   |                                |                            |
| 3 Months vs 1 Month for SBRT    | -1.11             | -2.07, -0.15                   | 0.02                       |
| 6 Months vs 1 Month for SBRT    | -1.03             | -1.99, -0.07                   | 0.04                       |
| 12 Months vs 1 Month for SBRT   | 0.02              | -0.88, 0.92                    | 0.97                       |
| Baseline NRPS Index Score       | 0.23              | 0.15, 0.31                     | <0.001                     |
| Radioresistant Tumor (vs other) | -0.06             | -0.70, 0.57                    | 0.84                       |
| Zubrod 1-2 vs. 0                | 0.20              | -0.29, 0.69                    | 0.42                       |

Modeling the probability of having lower NRPS scores. Outcome variable is ordinal pain response at 1, 3, 6, and 12 months. Reference levels in parenthesis are for binary variables. Effects of continuous variables are assessed as one unit offsets from the mean.

<sup>1</sup>P-value is from Type III Test of Fixed Effects (F-statistic).

<sup>2</sup>P-value is from t-test.

Covariates considered in the model (remained if p<0.10): pain medicine at study entry, RT dose, number of mets, time by treatment interaction. Baseline NRPS score, Zubrod score, and radioresistant tumor were forced in the model due to significantly differing between patients with and without completed NRPS scores.

SRS=stereotactic radiosurgery; cEBRT=conventional external beam radiotherapy; NRPS=Numerical Rating Pain Scale.

**Supplemental Table 6A. Rapidity of pain response**

| Month | SRS          |              |                           |         | cEBRT        |              |                           |         |
|-------|--------------|--------------|---------------------------|---------|--------------|--------------|---------------------------|---------|
|       | Estimate (%) | 95% CI (%)   | Cumulative Pain Responses | At Risk | Estimate (%) | 95% CI (%)   | Cumulative Pain Responses | At Risk |
| 0     | 100.0        | --           | 0                         | 209     | 100.0        | --           | 0                         | 129     |
| 3     | 39.8         | (32.8, 46.8) | 117                       | 61      | 50.3         | (41.0, 59.5) | 57                        | 45      |
| 6     | 29.2         | (22.2, 36.1) | 132                       | 32      | 25.4         | (16.0, 34.8) | 76                        | 15      |
| 9     | 24.4         | (17.5, 31.4) | 137                       | 19      | 21.9         | (12.6, 31.2) | 78                        | 9       |
| 12    | 24.4         | (17.5, 31.4) | 137                       | 16      | 21.9         | (12.6, 31.2) | 78                        | 8       |

Pain Response/Total: 140/209

Pain Response/Total: 80/130

Log-rank p-value = 0.84

Hazard Ratio [SRS/cEBRT] (95% CI): 0.97 (0.74, 1.28)

This includes weeks 1-3 data. Due to pain medication and pain response at secondary sites not able to be assessed accurately during weeks 1-3, pain medication and secondary sites were excluded from the pain response definition.

**Supplemental Table 6B. Duration of Pain Response (Including week 1-3)**

| Month | SRS          |               |                     |         | cEBRT        |               |                     |         |
|-------|--------------|---------------|---------------------|---------|--------------|---------------|---------------------|---------|
|       | Estimate (%) | 95% CI (%)    | Cumulative Failures | At Risk | Estimate (%) | 95% CI (%)    | Cumulative Failures | At Risk |
| 0     | 100.0        | --            | 0                   | 140     | 100.0        | --            | 0                   | 80      |
| 3     | 98.6         | (96.6, 100.0) | 2                   | 123     | 98.8         | (96.3, 100.0) | 1                   | 75      |
| 6     | 98.6         | (96.6, 100.0) | 2                   | 100     | 98.8         | (96.3, 100.0) | 1                   | 65      |
| 9     | 98.6         | (96.6, 100.0) | 2                   | 90      | 98.8         | (96.3, 100.0) | 1                   | 57      |
| 12    | 97.2         | (93.9, 100.0) | 3                   | 72      | 96.9         | (92.6, 100.0) | 2                   | 51      |

Pain Response /Total: 6/140

Pain Response /Total: 2/80

Log-rank p-value = 0.44

Hazard Ratio [SRS/cEBRT] (95% CI): 0.54 (0.11, 2.68)

This includes weeks 1- 3 data. Duration of pain response, defined as time from complete or partial pain relief to pain worsening ( $\geq 3$  points); Pain response begins when a patient improves at least 3 points, and pain response ends when the pain score increases by 3 points. Patients assessed at weeks 1, 2, and 3, and 3, 6, 12 and 24 months. Secondary sites are not taken into consideration.



**Supplemental Table 7. Repeated Measures Mixed Effects Model for FACT-G Total Score**

| Variables                       | Estimate | Standard Error | p- value |
|---------------------------------|----------|----------------|----------|
| <i>A. Complete case data</i>    |          |                |          |
| Baseline FACT-G Total Score     | 0.58     | 0.06           | <0.001   |
| Zubrod 1-2 (vs. 0)              | 0.37     | 1.91           | 0.85     |
| Radioresistant Tumor (vs other) | -0.24    | 2.26           | 0.92     |
| Non-white (vs. white)           | 2.56     | 2.39           | 0.29     |
| Female (vs. male)               | 0.32     | 1.79           | 0.86     |
| cEBRT (vs. SRS)                 | 1.29     | 1.75           | 0.46     |
| Time                            |          |                |          |
| 6 months (vs. 3 months)         | 1.23     | 2.01           | 0.54     |
| 12 months (vs. 3 months)        | -2.20    | 2.15           | 0.31     |
| <i>B. Imputed data</i>          |          |                |          |
| Baseline FACT-G Total Score     | 0.62     | 0.12           | <0.001   |
| Zubrod 1-2 (vs. 0)              | -4.01    | 4.57           | 0.38     |
| Radioresistant Tumor (vs other) | 5.33     | 6.60           | 0.42     |
| Non-white (vs. white)           | 4.40     | 5.90           | 0.46     |
| Female (vs. male)               | 1.75     | 4.17           | 0.67     |
| cEBRT (vs. SRS)                 | 5.02     | 5.46           | 0.36     |
| Time                            |          |                |          |
| 6 months (vs. 3 months)         | 2.92     | 12.03          | 0.81     |
| 12 months (vs. 3 months)        | 2.22     | 9.70           | 0.82     |

Outcome variable is FACT-G total score at 3, 6, and 12 months. Reference levels in parenthesis are for binary variables. Number of spine metastases, planned SRS dose, and baseline NRPS score fell out of model ( $p>0.10$ ). Variables found to significantly differ between patients with and without completed FACT-G assessments forced into model. SRS=stereotactic radiosurgery; cEBRT=conventional external beam radiotherapy; FACT-G=Functional Assessment of Cancer Therapy - General.

**Supplemental Table 8. Number of Patients with an Adverse Event by Category, Term, and Grade  
Definitely, Probably, or Possibly Related to Protocol Treatment**

| Category<br>Term                           | SRS<br>(n=202)<br>Grade |    |   |   |   | cEBRT<br>(n=117)<br>Grade |   |   |   |   |
|--------------------------------------------|-------------------------|----|---|---|---|---------------------------|---|---|---|---|
|                                            | 1                       | 2  | 3 | 4 | 5 | 1                         | 2 | 3 | 4 | 5 |
| <b>BLOOD/BONE MARROW</b>                   | 4                       | 8  | 6 | 1 | 0 | 3                         | 2 | 1 | 0 | 0 |
| Hemoglobin decreased                       | 2                       | 6  | 2 | 0 | 0 | 1                         | 2 | 1 | 0 | 0 |
| Leukopenia                                 | 0                       | 2  | 1 | 0 | 0 | 1                         | 1 | 0 | 0 | 0 |
| Lymphopenia                                | 0                       | 3  | 2 | 1 | 0 | 1                         | 0 | 0 | 0 | 0 |
| Neutrophil count decreased                 | 1                       | 1  | 1 | 0 | 0 | 0                         | 0 | 0 | 0 | 0 |
| Platelet count decreased                   | 2                       | 1  | 0 | 0 | 0 | 1                         | 0 | 1 | 0 | 0 |
| <b>CONSTITUTIONAL SYMPTOMS</b>             | 15                      | 8  | 5 | 0 | 0 | 9                         | 8 | 0 | 0 | 0 |
| Chills                                     | 0                       | 0  | 1 | 0 | 0 | 0                         | 0 | 0 | 0 | 0 |
| Fatigue                                    | 14                      | 8  | 5 | 0 | 0 | 7                         | 6 | 0 | 0 | 0 |
| General symptom                            | 0                       | 0  | 0 | 0 | 0 | 0                         | 1 | 0 | 0 | 0 |
| Weight loss                                | 1                       | 1  | 0 | 0 | 0 | 3                         | 2 | 0 | 0 | 0 |
| <b>DERMATOLOGY/SKIN</b>                    | 2                       | 1  | 0 | 0 | 0 | 3                         | 1 | 0 | 0 | 0 |
| Alopecia                                   | 0                       | 0  | 0 | 0 | 0 | 1                         | 0 | 0 | 0 | 0 |
| Dermatitis radiation                       | 0                       | 0  | 0 | 0 | 0 | 1                         | 1 | 0 | 0 | 0 |
| Dry skin                                   | 1                       | 0  | 0 | 0 | 0 | 0                         | 0 | 0 | 0 | 0 |
| Pruritus                                   | 1                       | 0  | 0 | 0 | 0 | 0                         | 0 | 0 | 0 | 0 |
| Radiation recall reaction (dermatologic)   | 0                       | 0  | 0 | 0 | 0 | 1                         | 0 | 0 | 0 | 0 |
| Rash desquamating                          | 0                       | 1  | 0 | 0 | 0 | 0                         | 0 | 0 | 0 | 0 |
| <b>GASTROINTESTINAL</b>                    | 11                      | 15 | 3 | 0 | 0 | 12                        | 4 | 2 | 0 | 0 |
| Abdominal distension                       | 0                       | 0  | 0 | 0 | 0 | 0                         | 1 | 0 | 0 | 0 |
| Anorexia                                   | 5                       | 1  | 0 | 0 | 0 | 1                         | 0 | 1 | 0 | 0 |
| Constipation                               | 2                       | 1  | 0 | 0 | 0 | 0                         | 0 | 0 | 0 | 0 |
| Diarrhea                                   | 3                       | 1  | 1 | 0 | 0 | 5                         | 1 | 0 | 0 | 0 |
| Dry mouth                                  | 1                       | 1  | 0 | 0 | 0 | 1                         | 0 | 0 | 0 | 0 |
| Dysphagia                                  | 1                       | 2  | 0 | 0 | 0 | 1                         | 0 | 0 | 0 | 0 |
| Esophageal ulcer                           | 0                       | 0  | 0 | 0 | 0 | 0                         | 0 | 1 | 0 | 0 |
| Esophagitis                                | 1                       | 0  | 0 | 0 | 0 | 1                         | 2 | 0 | 0 | 0 |
| Gastrointestinal disorder                  | 0                       | 1  | 0 | 0 | 0 | 0                         | 0 | 1 | 0 | 0 |
| Nausea                                     | 8                       | 8  | 1 | 0 | 0 | 5                         | 2 | 0 | 0 | 0 |
| Small intestinal obstruction               | 0                       | 0  | 1 | 0 | 0 | 0                         | 0 | 0 | 0 | 0 |
| Taste alteration                           | 0                       | 1  | 0 | 0 | 0 | 0                         | 0 | 0 | 0 | 0 |
| Vomiting                                   | 4                       | 5  | 1 | 0 | 0 | 1                         | 0 | 0 | 0 | 0 |
| <b>INFECTION</b>                           | 0                       | 0  | 1 | 1 | 0 | 0                         | 0 | 0 | 1 | 0 |
| Pneumonia [with unknown ANC]               | 0                       | 0  | 1 | 0 | 0 | 0                         | 0 | 0 | 0 | 0 |
| Sepsis [with unknown ANC]                  | 0                       | 0  | 0 | 1 | 0 | 0                         | 0 | 0 | 1 | 0 |
| Urinary tract infection [with unknown ANC] | 0                       | 0  | 1 | 0 | 0 | 0                         | 0 | 0 | 0 | 0 |
| <b>LYMPHATICS</b>                          | 0                       | 1  | 0 | 0 | 0 | 0                         | 0 | 0 | 0 | 0 |
| Edema limbs                                | 0                       | 1  | 0 | 0 | 0 | 0                         | 0 | 0 | 0 | 0 |

**Supplemental Table 8. Number of Patients with an Adverse Event by Category, Term, and Grade  
Definitely, Probably, or Possibly Related to Protocol Treatment**

| Category                             | SRS<br>(n=202) |    |    |   |   | cEBRT<br>(n=117) |    |   |   |   |
|--------------------------------------|----------------|----|----|---|---|------------------|----|---|---|---|
|                                      | Grade          |    |    |   |   | Grade            |    |   |   |   |
| Term                                 | 1              | 2  | 3  | 4 | 5 | 1                | 2  | 3 | 4 | 5 |
| <b>METABOLIC/LABORATOR</b>           | 2              | 1  | 0  | 0 | 0 | 1                | 1  | 1 | 0 | 0 |
| Alanine aminotransferase increased   | 1              | 0  | 0  | 0 | 0 | 1                | 0  | 0 | 0 | 0 |
| Alkaline phosphatase increased       | 2              | 0  | 0  | 0 | 0 | 0                | 0  | 0 | 0 | 0 |
| Aspartate aminotransferase increased | 1              | 0  | 0  | 0 | 0 | 0                | 0  | 0 | 0 | 0 |
| Creatinine increased                 | 0              | 1  | 0  | 0 | 0 | 0                | 0  | 0 | 0 | 0 |
| Hyperbilirubinemia                   | 0              | 0  | 0  | 0 | 0 | 0                | 1  | 0 | 0 | 0 |
| Hyperglycemia                        | 0              | 0  | 0  | 0 | 0 | 2                | 1  | 0 | 0 | 0 |
| Hypocalcemia                         | 0              | 0  | 0  | 0 | 0 | 0                | 0  | 1 | 0 | 0 |
| Hypoglycemia                         | 0              | 0  | 0  | 0 | 0 | 1                | 0  | 0 | 0 | 0 |
| <b>MUSCULOSKELETAL/SOFT TISSUE</b>   | 3              | 4  | 3  | 0 | 1 | 2                | 1  | 0 | 0 | 0 |
| Fracture                             | 1              | 1  | 3  | 0 | 0 | 0                | 1  | 0 | 0 | 0 |
| Gait abnormal                        | 0              | 1  | 0  | 0 | 0 | 0                | 0  | 0 | 0 | 0 |
| Muscle weakness                      | 1              | 0  | 0  | 0 | 0 | 2                | 0  | 0 | 0 | 0 |
| Muscle weakness lower limb           | 0              | 2  | 0  | 0 | 0 | 0                | 0  | 0 | 0 | 0 |
| Musculoskeletal disorder             | 1              | 1  | 0  | 0 | 1 | 0                | 0  | 0 | 0 | 0 |
| <b>NEUROLOGY</b>                     | 5              | 2  | 0  | 0 | 0 | 2                | 2  | 0 | 0 | 0 |
| Anxiety                              | 0              | 0  | 0  | 0 | 0 | 1                | 0  | 0 | 0 | 0 |
| Arachnoiditis                        | 0              | 1  | 0  | 0 | 0 | 0                | 0  | 0 | 0 | 0 |
| Depressed level of consciousness     | 0              | 1  | 0  | 0 | 0 | 0                | 0  | 0 | 0 | 0 |
| Depression                           | 1              | 0  | 0  | 0 | 0 | 0                | 0  | 0 | 0 | 0 |
| Memory impairment                    | 1              | 0  | 0  | 0 | 0 | 0                | 0  | 0 | 0 | 0 |
| Peripheral motor neuropathy          | 0              | 0  | 0  | 0 | 0 | 1                | 1  | 0 | 0 | 0 |
| Peripheral sensory neuropathy        | 2              | 0  | 0  | 0 | 0 | 1                | 0  | 0 | 0 | 0 |
| Radiculitis brachial                 | 1              | 0  | 0  | 0 | 0 | 0                | 0  | 0 | 0 | 0 |
| Speech disorder                      | 0              | 0  | 0  | 0 | 0 | 0                | 1  | 0 | 0 | 0 |
| <b>PAIN</b>                          | 13             | 18 | 16 | 0 | 0 | 7                | 11 | 5 | 0 | 0 |
| Abdominal pain                       | 3              | 3  | 1  | 0 | 0 | 0                | 2  | 1 | 0 | 0 |
| Back pain                            | 9              | 8  | 12 | 0 | 0 | 3                | 8  | 4 | 0 | 0 |
| Bone pain                            | 0              | 2  | 1  | 0 | 0 | 0                | 1  | 1 | 0 | 0 |
| Buttock pain                         | 0              | 1  | 0  | 0 | 0 | 0                | 0  | 0 | 0 | 0 |
| Chest pain                           | 0              | 1  | 0  | 0 | 0 | 0                | 0  | 0 | 0 | 0 |
| Chest wall pain                      | 2              | 2  | 0  | 0 | 0 | 0                | 0  | 0 | 0 | 0 |
| Joint pain                           | 2              | 1  | 0  | 0 | 0 | 0                | 0  | 0 | 0 | 0 |
| Myalgia                              | 1              | 0  | 0  | 0 | 0 | 0                | 0  | 0 | 0 | 0 |
| Neck pain                            | 0              | 1  | 1  | 0 | 0 | 1                | 0  | 0 | 0 | 0 |
| Neuralgia                            | 0              | 1  | 0  | 0 | 0 | 0                | 1  | 0 | 0 | 0 |
| Oral pain                            | 1              | 0  | 0  | 0 | 0 | 0                | 0  | 0 | 0 | 0 |
| Pain [NOS]                           | 1              | 1  | 0  | 0 | 0 | 1                | 2  | 0 | 0 | 0 |
| Pain [other]                         | 0              | 1  | 0  | 0 | 0 | 1                | 1  | 0 | 0 | 0 |
| Pain in extremity                    | 1              | 3  | 0  | 0 | 0 | 1                | 1  | 0 | 0 | 0 |
| Pelvic pain                          | 0              | 0  | 1  | 0 | 0 | 0                | 0  | 0 | 0 | 0 |
| Pharyngolaryngeal pain               | 0              | 0  | 0  | 0 | 0 | 1                | 0  | 0 | 0 | 0 |

**Supplemental Table 8. Number of Patients with an Adverse Event by Category, Term, and Grade Definitely, Probably, or Possibly Related to Protocol Treatment**

| Category<br>Term                   | SRS<br>(n=202)<br>Grade |   |   |   |   | cEBRT<br>(n=117)<br>Grade |   |   |   |   |
|------------------------------------|-------------------------|---|---|---|---|---------------------------|---|---|---|---|
|                                    | 1                       | 2 | 3 | 4 | 5 | 1                         | 2 | 3 | 4 | 5 |
| <b>PULMONARY/UPPER RESPIRATORY</b> | 4                       | 1 | 1 | 0 | 0 | 2                         | 0 | 0 | 0 | 0 |
| Cough                              | 1                       | 0 | 1 | 0 | 0 | 1                         | 0 | 0 | 0 | 0 |
| Dyspnea                            | 1                       | 1 | 1 | 0 | 0 | 0                         | 0 | 0 | 0 | 0 |
| Pneumonitis                        | 1                       | 0 | 0 | 0 | 0 | 0                         | 0 | 0 | 0 | 0 |
| Voice alteration                   | 1                       | 0 | 0 | 0 | 0 | 1                         | 0 | 0 | 0 | 0 |
| <b>RENAL/GENITOURINARY</b>         | 0                       | 2 | 1 | 0 | 0 | 0                         | 0 | 0 | 0 | 0 |
| Cystitis                           | 0                       | 1 | 0 | 0 | 0 | 0                         | 0 | 0 | 0 | 0 |
| Urinary incontinence               | 0                       | 1 | 0 | 0 | 0 | 0                         | 0 | 0 | 0 | 0 |
| Urogenital disorder                | 0                       | 1 | 1 | 0 | 0 | 0                         | 0 | 0 | 0 | 0 |

Includes adverse events where relationship to protocol treatment is missing.  
Adverse events were graded with CTCAE version 3.0.

**Supplemental Table 9. Time to Compression Fracture**

| Year                       | SRS          |            |                     |         | cEBRT        |            |                     |         |
|----------------------------|--------------|------------|---------------------|---------|--------------|------------|---------------------|---------|
|                            | Estimate (%) | 95% CI (%) | Cumulative Failures | At Risk | Estimate (%) | 95% CI (%) | Cumulative Failures | At Risk |
| 0                          |              |            | 0                   | 209     |              |            | 0                   | 130     |
| 3                          | 6.8          | 3.9, 10.8  | 14                  | 156     | 10.0         | 5.4, 16.1  | 12                  | 88      |
| 6                          | 12.7         | 8.6, 17.7  | 26                  | 113     | 15.2         | 9.4, 22.3  | 18                  | 64      |
| 9                          | 15.2         | 10.7, 20.5 | 31                  | 94      | 17.0         | 10.8, 24.3 | 20                  | 55      |
| 12                         | 15.7         | 11.1, 21.1 | 32                  | 75      | 18.7         | 12.2, 26.3 | 22                  | 48      |
| 15                         | 18.4         | 13.4, 24.1 | 37                  | 57      | 20.6         | 13.7, 28.4 | 24                  | 35      |
| 18                         | 18.9         | 13.8, 24.7 | 38                  | 50      | 21.6         | 14.6, 29.6 | 25                  | 31      |
| 21                         | 19.5         | 14.3, 25.3 | 39                  | 46      | 21.6         | 14.6, 29.6 | 25                  | 30      |
| 24                         | 19.5         | 14.3, 25.3 | 39                  | 37      | 21.6         | 14.6, 29.6 | 25                  | 20      |
| Compression fracture/Total |              |            | 39/209              |         | 25/130       |            |                     |         |
| p-value (Gray (two-sided)) |              |            | 0.59                |         |              |            |                     |         |
