# Supplementary material
Source: PubMed Central journal article supplement (PMC10119775)
Supplement: jamaoncol-e230356-s003.pdf [file jamaoncol-e230356-s003.pdf]

## Data Sharing Statement

Ryu. Stereotactic vs Conventional Radiotherapy for Localized Vertebral Metastases of the Spine. *JAMA Oncol.* Published April 20, 2023. doi:10.1001/jamaoncol.2023.0356

### Data

**Data available:** Yes

**Data types:** Deidentified participant data, Other (please specify)

**Additional Information:** Data will be made available per the Data Archiving Rules -<https://nctn-data-archive.nci.nih.gov/>

**How to access data:** Data will be made available per the Data Archiving Rules -<https://nctn-data-archive.nci.nih.gov/>

**When available:** beginning date: 02-01-2023

### Supporting Documents

**Document types:** None

### Additional Information

**Who can access the data:** Per NCTN Data Archive Rules

**Types of analyses:** Per NCTN Data Archive Rules

**Mechanisms of data availability:** Per NCTN Data Archive Rules

**Any additional restrictions:** Per NCTN Data Archive Rules
